# Supplementary material for: Quercetin and its metabolite isorhamnetin promote glucose uptake through different signalling pathways in myotubes
Source: PubMed Central journal article supplement (PMC6389993; doi:10.1038/s41598-019-38711-7), 2019-02-25

1 **Supplementary information**

2

3 **Quercetin and its metabolite isorhamnetin promote glucose uptake through**  
4 **different signalling pathways in myotubes**

5 Hao Jiang<sup>1</sup>, Yoko Yamashita<sup>1</sup>, Asuka Nakamura<sup>1</sup>, Kevin Croft<sup>2</sup>, Hitoshi Ashida<sup>1\*</sup>

6 **Affiliations**

7 <sup>1</sup>Department of Agrobioscience, Graduate School of Agricultural Science, Kobe University,  
8 Kobe, 657-8501, Japan.

9 <sup>2</sup> School of Biomedical Science, The University of Western Australia, Crawley, WA 6009,  
10 Australia.

11 **\*Corresponding author**

12 Hitoshi Ashida

13 Postal address: Graduate School of Agricultural Science, Kobe University, 1-1, Rokkodai-cho,  
14 Nada-ku, Kobe, Hyogo 657-8501, Japan. Tel: +81-78-803-5878.

15 E-mail: ashida@kobe-u.ac.jp.

16

17

18

19

20 **Methods**

21 **Materials** Quercetin and dimethyl sulfoxide (DMSO) were purchased from Wako Pure  
22 Chemical Industries (Osaka, Japan), while isorhamnetin was from Extrasynthese (Genay,  
23 Franch). 5-aminoimidazole-4-carboxyamide ribonucleoside (AICAR) and leptin were  
24 obtained from Sigma-Aldrich (St. Louis, MO). Bovine serum albumin (BSA), Blocking-One  
25 and Blocking One-P solutions were from Nacalai Tesque (Kyoto, Japan). Polyvinylidene  
26 difluoride membrane was from GE Healthcare (Fairfield, WA). Minimum essential medium  
27 (MEM) was from Nissui Pharmaceutical (Tokyo, Japan). Protease and phosphatase inhibitor  
28 cocktails were purchased from Roche Diagnostics (Tokyo, Japan). For western blotting  
29 analysis, anti-Akt rabbit IgG, anti-phospho-AMPK $\alpha$  (Thr 172) rabbit IgG, anti-AMPK $\alpha$  rabbit  
30 IgG, anti-JAK2 rabbit IgG, anti-phospho-JAK2 rabbit IgG, anti-mouse IgG, and anti-rabbit  
31 IgG antibodies were from Cell Signaling Technology (Danvers, MA). Anti-phospho-Akt  
32 (Thr308) rabbit IgG and anti-phospho-Akt (Ser473) rabbit IgG were from Sigma Chemical  
33 (St. Louis, MO).

34 **Cell culture and treatment** *In vitro* cultured cell experiments were conducted according to  
35 a previously described protocol<sup>1,2</sup>. Briefly, L6 myoblasts derived from rat skeletal muscle and  
36 of less than 40 passages were maintained in MEM supplemented with 10% FBS and  
37 antibiotics (100 U/mL penicillin and 100  $\mu$ g/mL streptomycin) at 37°C under a humidified  
38 atmosphere condition of 5% CO<sub>2</sub> and 95% air. In each experiment, cells ( $2.2 \times 10^4$  cells/mL)  
39 were seeded into 96-well plates or 60-mm dishes for induction of differentiation into mature  
40 myotubes. After reaching confluence, cells were supplemented with differentiation medium  
41 containing 2% FBS and the same antibiotics for 7 days. Cells were used for each experiment

42 after morphological analysis of differentiation status using phase-contrast microscopy.

43 **Preparation of whole protein and plasma membrane fractions** After serum starvation  
44 for 18 h, myotubes were treated with various concentrations of quercetin or isorhamnetin (1–  
45 10  $\mu$ M) for 15 min; DMSO (final 0.1%) was used as a vehicle control. As positive controls,  
46 100 nM insulin, 1 mM AICAR, or 10 nM leptin were used for insulin, AMPK or JAK2/STAT  
47 signalling pathways, respectively. Cells were treated with insulin or AICAR for 15 min, or  
48 leptin for 60 min. Whole protein and plasma membrane fractions were prepared from  
49 myotubes as previously described<sup>3,4</sup>.

50 **Western blot analysis** Expression and phosphorylation levels of GLUT4-related regulators  
51 were estimated by western blot analysis. Briefly, equal amounts of proteins were separated by  
52 sodium dodecyl sulfate-polyacrylamide gel electrophoresis (SDS-PAGE). Separated proteins  
53 were transferred onto a polyvinylidene fluoride membrane and nonspecific binding sites were  
54 blocked using either Blocking One (to detect unphosphorylated proteins) or Blocking One-P  
55 (to detect phosphoproteins). The membrane was incubated overnight with an appropriate  
56 primary antibody for p-Akt (1:5000), Akt (1:10000), p-AMPK $\alpha$  (1:5000), AMPK $\alpha$  (1:10000),  
57 p-JAK2 (1:5000), or JAK2 (1:5000), and subsequently treated with the corresponding  
58 horseradish peroxidase-conjugated secondary antibody (1:50000) for 1 h. Specific immune  
59 complexes were developed using ImmunoStar<sup>®</sup> LD and detected with an ATTO Light-Capture  
60 II Western Blotting Detection System. Individual band density was calculated by ImageJ and  
61 normalized to the control.

62 All western blot data was performed the same gel and not combined from the different gels.

63 In the supplementary Figure 4-12, the gel was cropped from parts showing red rectangle of

64 the same gel.

65 **Statistical analysis** Data are represented as mean  $\pm$  SD from at least three independent  
66 experiments. Statistical analysis was performed using Dunnett or Tukey–Kramer  
67 multiple-comparison tests. The statistical significance level was set at  $p < 0.05$  using JMP  
68 11.2.0.

69

## 70 **Results**

### 71 **Quercetin and isorhamnetin activated insulin-, AMPK- and JAK2/STAT-dependent** 72 **pathways in L6 myotubes.**

73 At higher concentrations (1  $\mu$ M and 10  $\mu$ M), quercetin and isorhamnetin significantly  
74 increased phosphorylation of Akt at Ser473 (Supplementary Fig. 1). At these concentrations,  
75 quercetin and isorhamnetin also induced phosphorylation of AMPK (Supplementary Fig. 2)  
76 and JAK2 (Supplemental Fig. 3). However, expression levels of these proteins was unaffected  
77 by treatment with these compounds.

78

## 79 **References**

- 80 1. Sawada, K., Yamashita, Y., Zhang, T., Nakagawa, K.& Ashida, H. Glabridin induces  
81 glucose uptake via the AMP-activated protein kinase pathway in muscle cells. *Mol Cell*  
82 *Endocrinol.* **5**, 99-108 (2014).

- 83 2. Ueda, M., Hayashibara, K. & Ashida, H. Propolis extract promotes translocation of  
84 glucose transporter 4 and glucose uptake through both PI3K- and AMPK-dependent  
85 pathways in skeletal muscle. *Biofactors*. **39**, 457-466 (2013).
- 86 3. Nishiumi, S. & Ashida, H. Rapid preparation of a plasma membrane fraction from  
87 adipocytes and muscle cells: application to detection of translocated glucose transporter  
88 4 on the plasma membrane. *Biosci. Biotechnol. Biochem*, **71**, 2343-2346 (2007).
- 89 4. Yamamoto, N., Yamashita, Y., Yoshioka, Y., Nishiumi, S. & Ashida, H. Rapid  
90 preparation of a plasma membrane fraction: western blot detection of translocated  
91 glucose transporter 4 from plasma membrane of muscle and adipose cells and tissues.  
92 *Curr Protoc Protein Sci*. **85**, 1-12 (2016).

94 **Figure legends**

95 Figure S1. Effect of quercetin and isorhamnetin on insulin signalling in L6 myotubes.  
96 Differentiated L6 myotubes were treated with quercetin and isorhamnetin at the indicated  
97 concentrations for 15 min. Cell lysates were prepared and subjected to analysis of  
98 phosphorylation and expression of proteins in the insulin signalling pathway by western  
99 blotting. Arrow showed the target protein blots. Marked blots are presented in Supplementary  
100 Figure S10. Representative data are shown from independent triplicate analyses. Band density  
101 was measured and represented as the ratio of p-Akt to Akt. Values shown represent mean  $\pm$   
102 SD (n = 3). \* and \*\* indicate significant differences from control cells by Dunnett's multiple  
103 comparison test (\* $p < 0.05$  and\*\* $p < 0.01$ , respectively).

104

105 Figure S2. Effect of quercetin and isorhamnetin on the AMPK signalling pathway in L6  
106 myotubes. Differentiated L6 myotubes were treated with quercetin and isorhamnetin at the  
107 indicated concentrations for 15 min. Cell lysates were prepared and subjected to analysis of  
108 phosphorylation and expression of proteins in the AMPK signalling pathway by western  
109 blotting. Arrow showed the target protein blots. Marked blots are presented in Supplementary  
110 Figure S11. Representative data are shown from independent triplicate analyses. Band density  
111 was measured and represented as the ratio of p-AMPK to AMPK. Values shown represent  
112 mean  $\pm$  SD (n = 3). \* and \*\* indicate significant differences from control cells by Dunnett's  
113 multiple comparison test (\* $p < 0.05$  and\*\* $p < 0.01$ , respectively).

114

115 Figure S3. Effect of quercetin and isorhamnetin on the JAK/STAT signalling pathway in L6

116 myotubes. Differentiated L6 myotubes were treated with quercetin and isorhamnetin at the  
117 indicated concentrations for 15 min. Cell lysates were prepared and subjected to analysis of  
118 phosphorylation and expression of proteins in the JAK/STAT signalling pathway by western  
119 blotting. Arrow showed the target protein blots. Marked blots are presented in Supplementary  
120 Figure S12. Representative data are shown from independent triplicate analyses. Band density  
121 was measured and represented as the ratio of p-JAK2 to JAK2. Values shown represent mean  
122  $\pm$  SD (n = 3). \* and \*\* indicate significant differences from control cells by Dunnett's  
123 multiple comparison test (\* $p$  < 0.05, and \*\* $p$  < 0.01, respectively).

124

125 Figure S4. This figure is supported information for Figure 3 in the manuscript.

126

127 Figure S5. This figure is supported information for Figure 4 in the manuscript.

128

129 Figure S6. This figure is supported information for Figure 5 in the manuscript.

130

131 Figure S7. This figure is supported information for Figure 6 in the manuscript.

132

133 Figure S8. This figure is supported information for Figure 7 in the manuscript.

134

135 Figure S9. This figure is supported information for Figure 8 in the manuscript.

136

137 Figure S10. This figure is supported information for Supplemental Figure S1 in the  
138 Supplemental data.

139

140 Figure S11. This figure is supported information for Supplemental Figure S2 in the  
141 Supplemental data.

142

143 Figure S12. This figure is supported information for Supplemental Figure S3 in the  
144 Supplemental data.



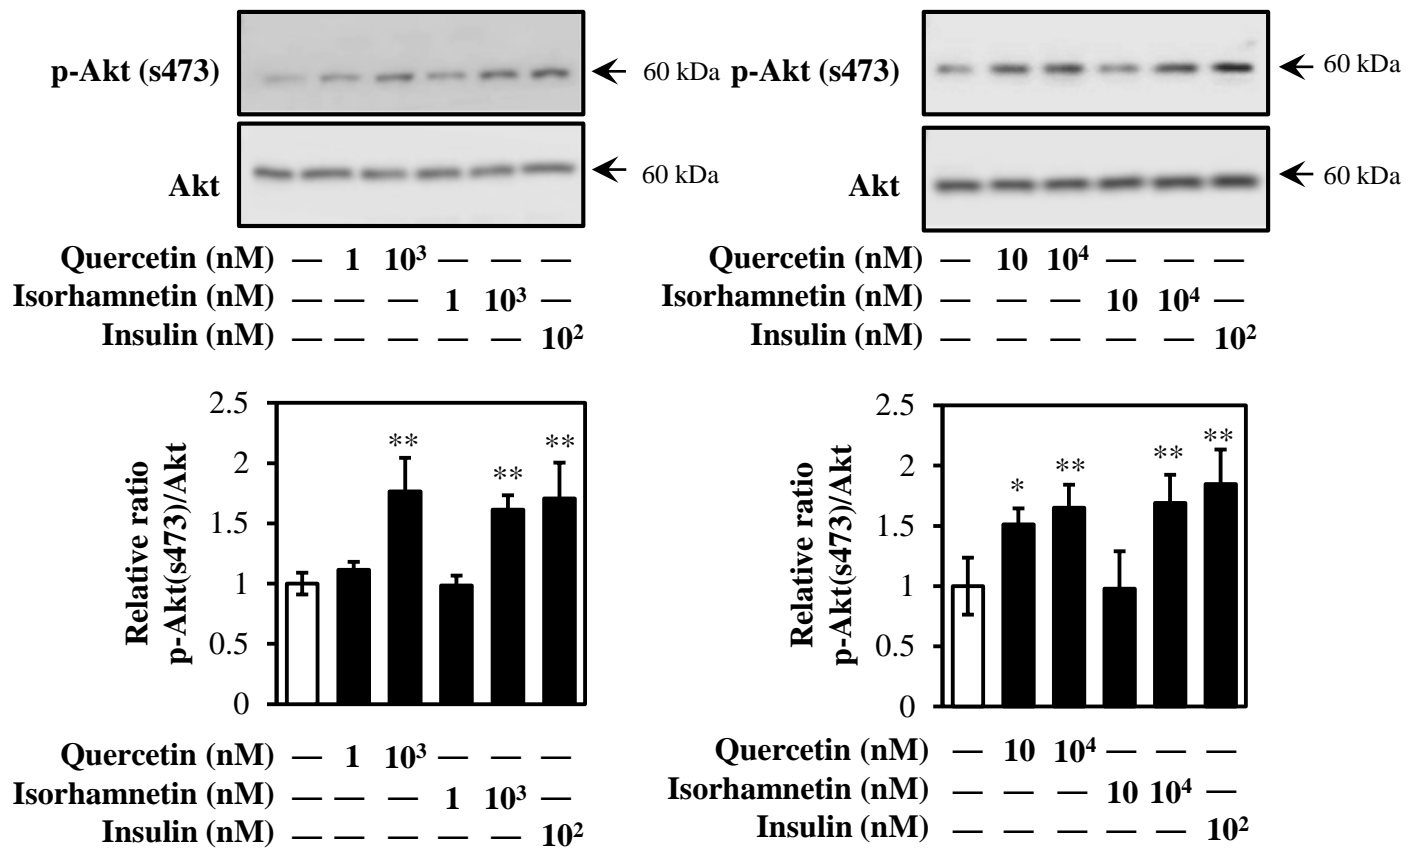

Supplemental Figure 2

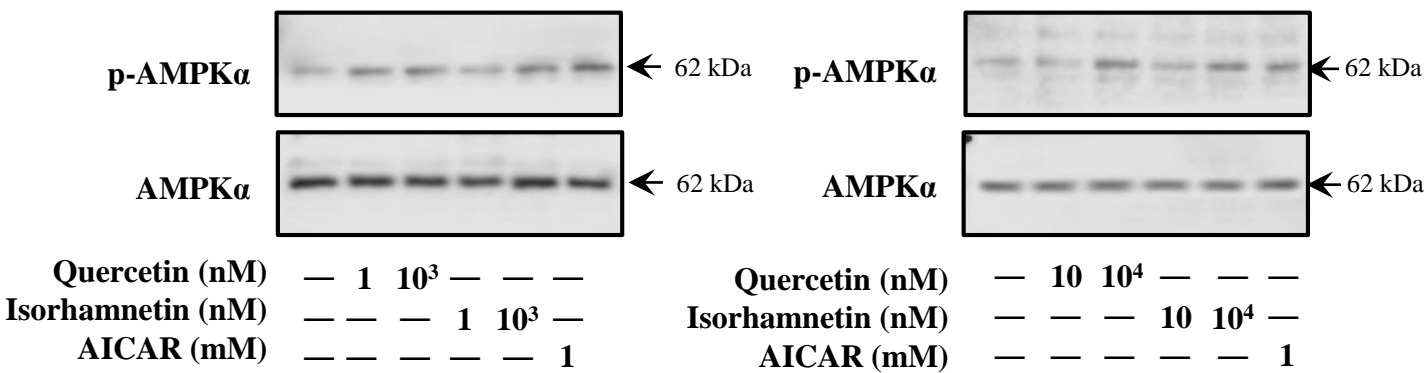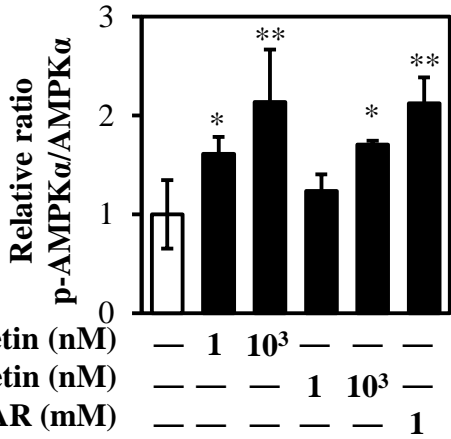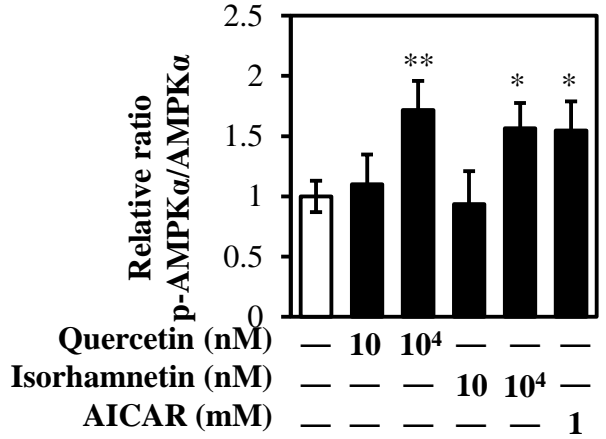

Supplemental Figure 3

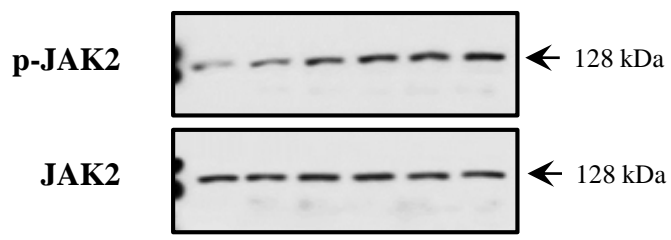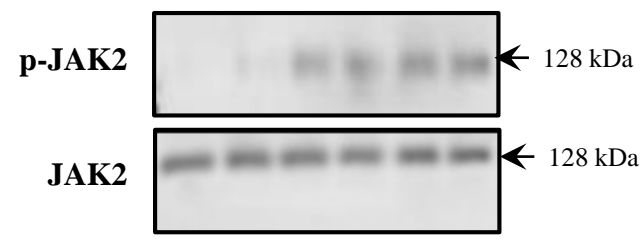

Quercetin (nM) — 1 10<sup>3</sup> — — —  
Isorhamnetin (nM) — — — 1 10<sup>3</sup> —  
Leptin (nM) — — — — — 10

Quercetin (nM) — 10 10<sup>4</sup> — — —  
Isorhamnetin (nM) — — — 10 10<sup>4</sup> —  
Leptin (nM) — — — — — 10

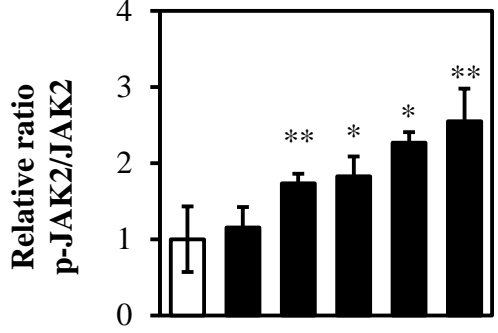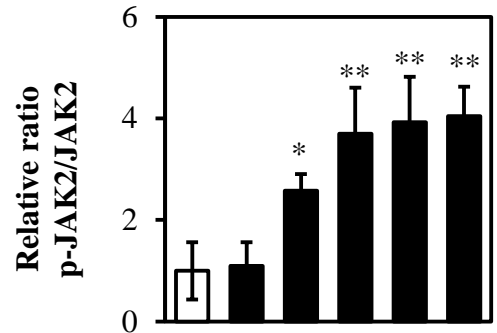

Quercetin (nM) — 1 10<sup>3</sup> — — —  
Isorhamnetin (nM) — — — 1 10<sup>3</sup> —  
Leptin (nM) — — — — — 10

Quercetin (nM) — 10 10<sup>4</sup> — — —  
Isorhamnetin (nM) — — — 10 10<sup>4</sup> —  
Leptin (nM) — — — — — 10

(A)

**Plasma membrane**

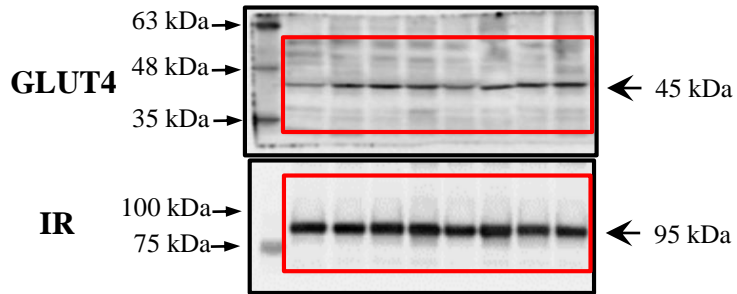

**Post plasma membrane**

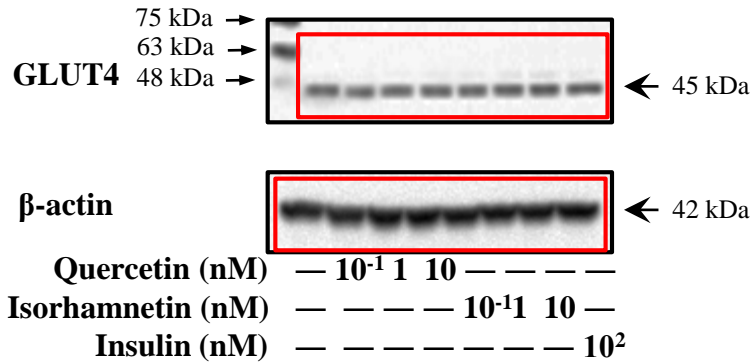

(B)

**Plasma membrane**

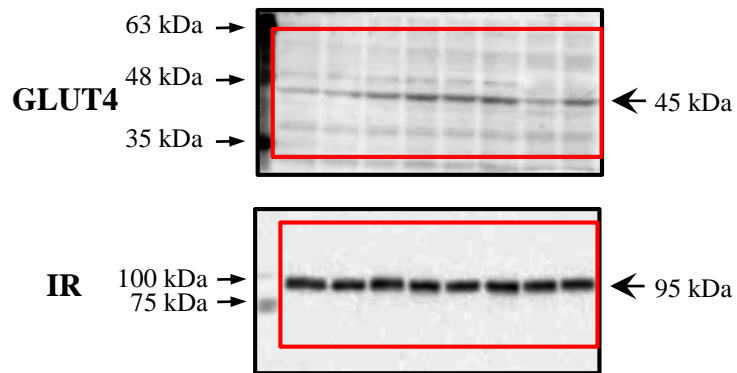

|                         |   |     |    |    |    |     |     |    |
|-------------------------|---|-----|----|----|----|-----|-----|----|
| <b>Quercetin (1 nM)</b> | — | +   | +  | +  | +  | +   | +   | —  |
| <b>Insulin (100 nM)</b> | — | —   | —  | —  | —  | —   | —   | +  |
| <b>Times (min)</b>      | — | 7.5 | 15 | 30 | 60 | 120 | 240 | 15 |

(A)

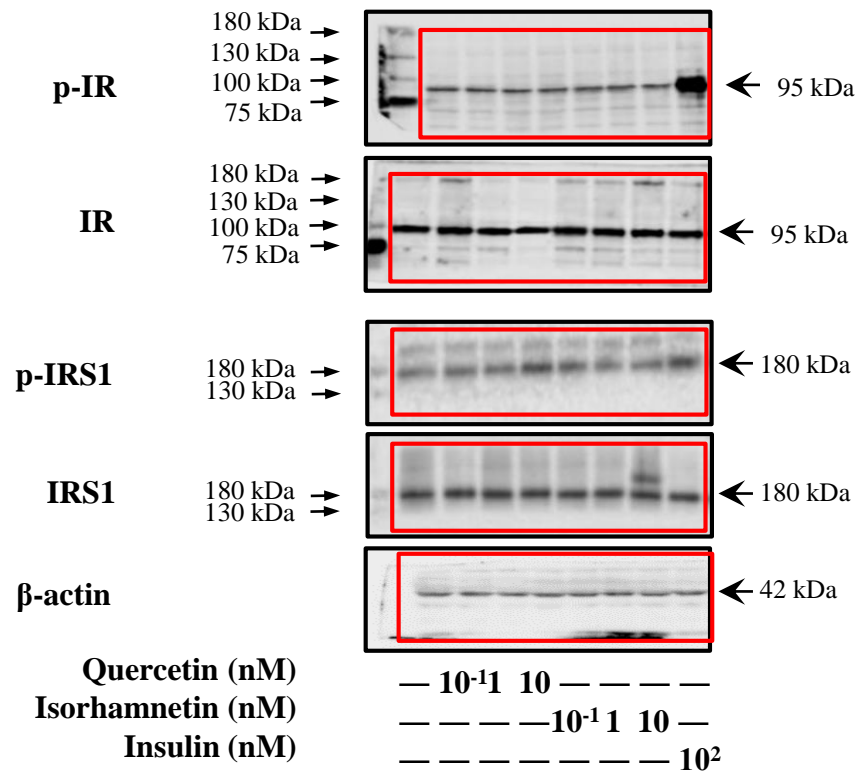

(B)

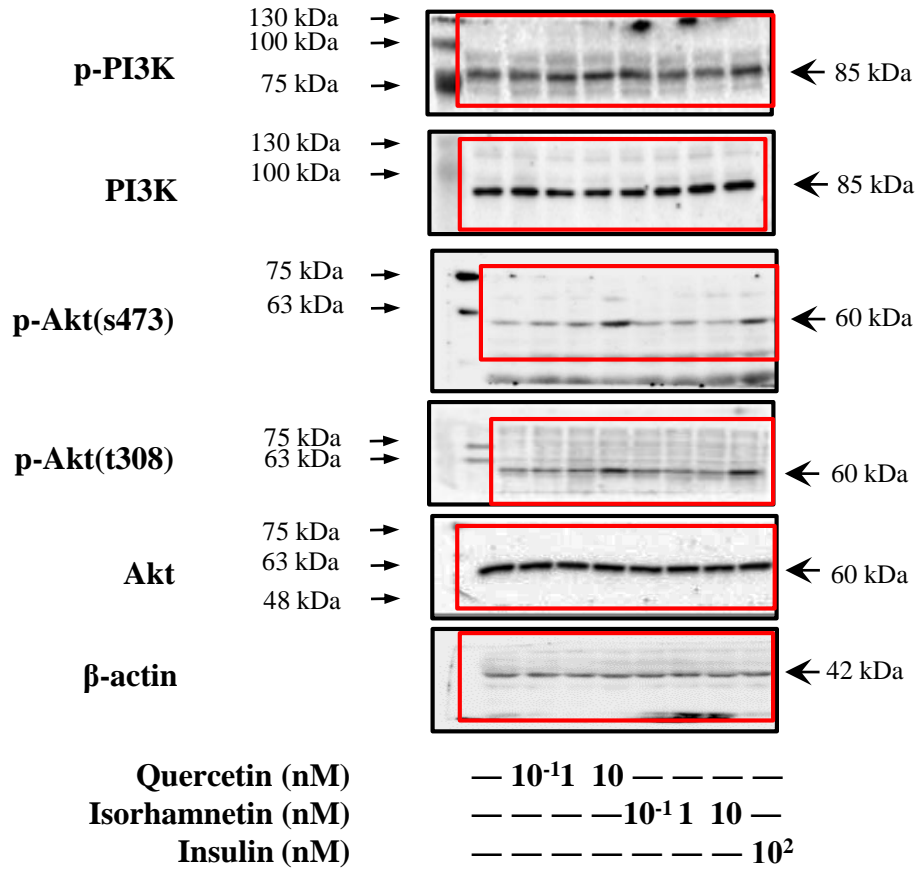

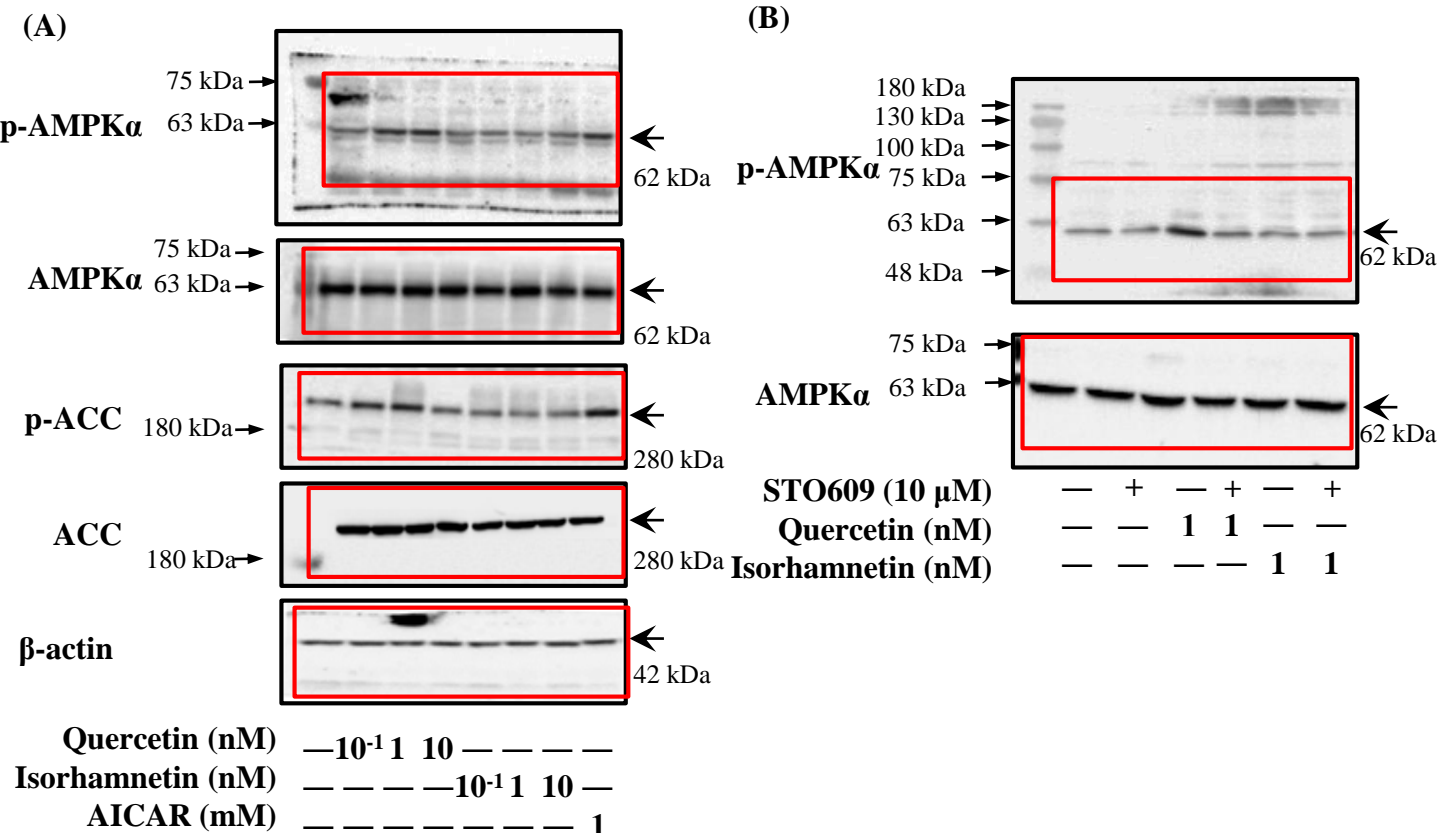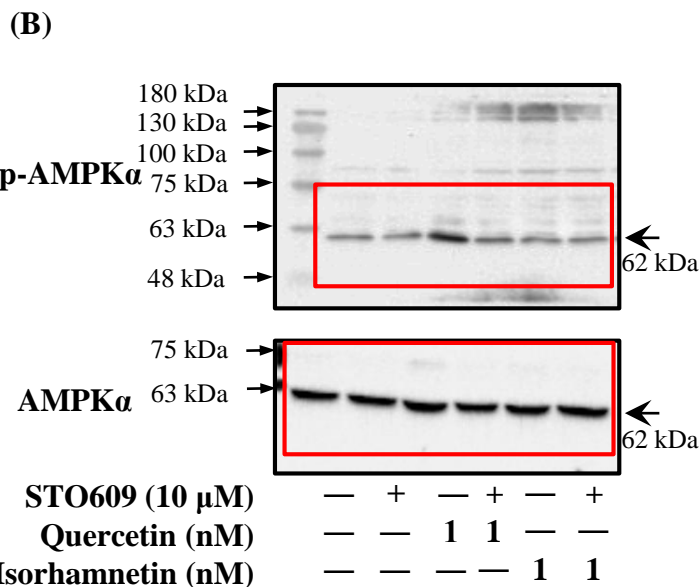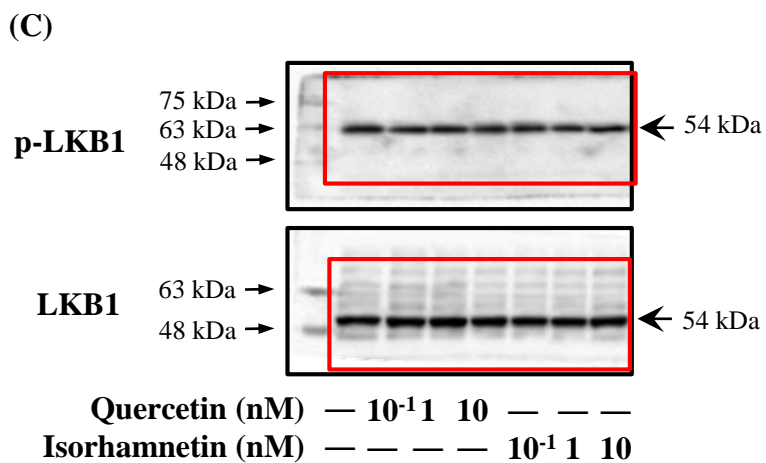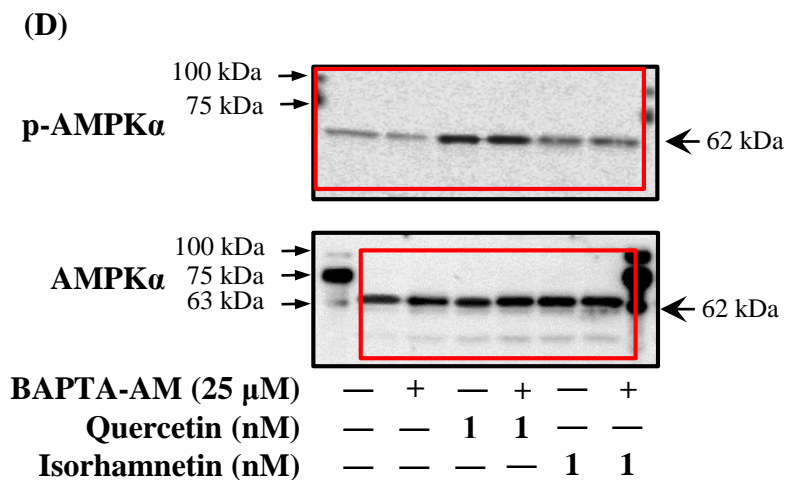

(A)

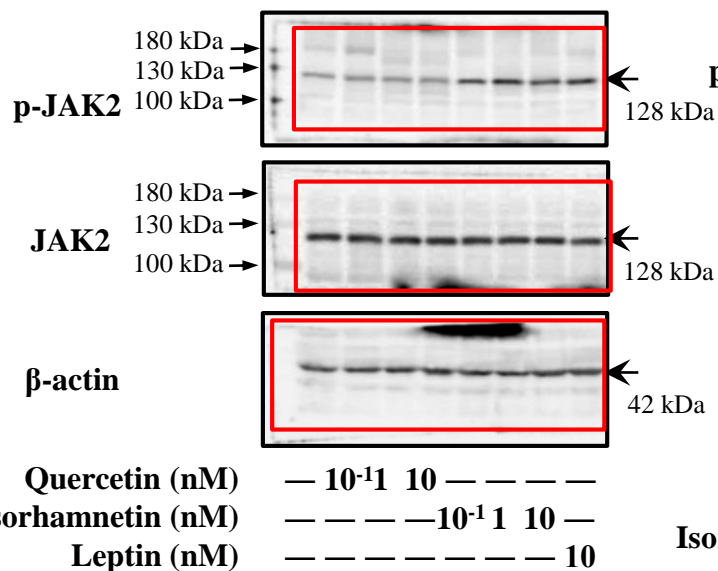

(B)

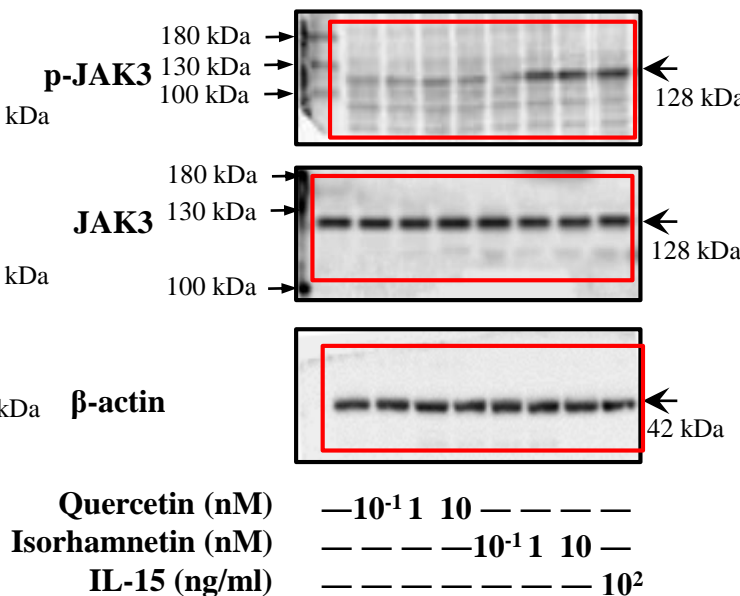

(C)

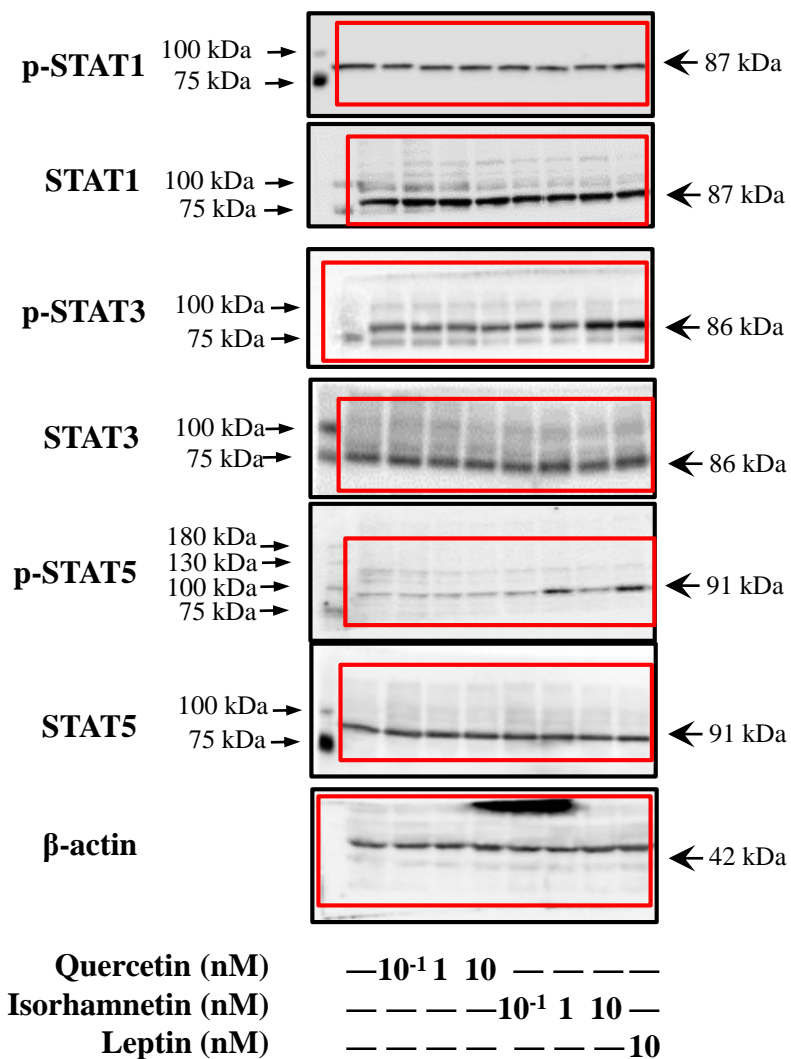

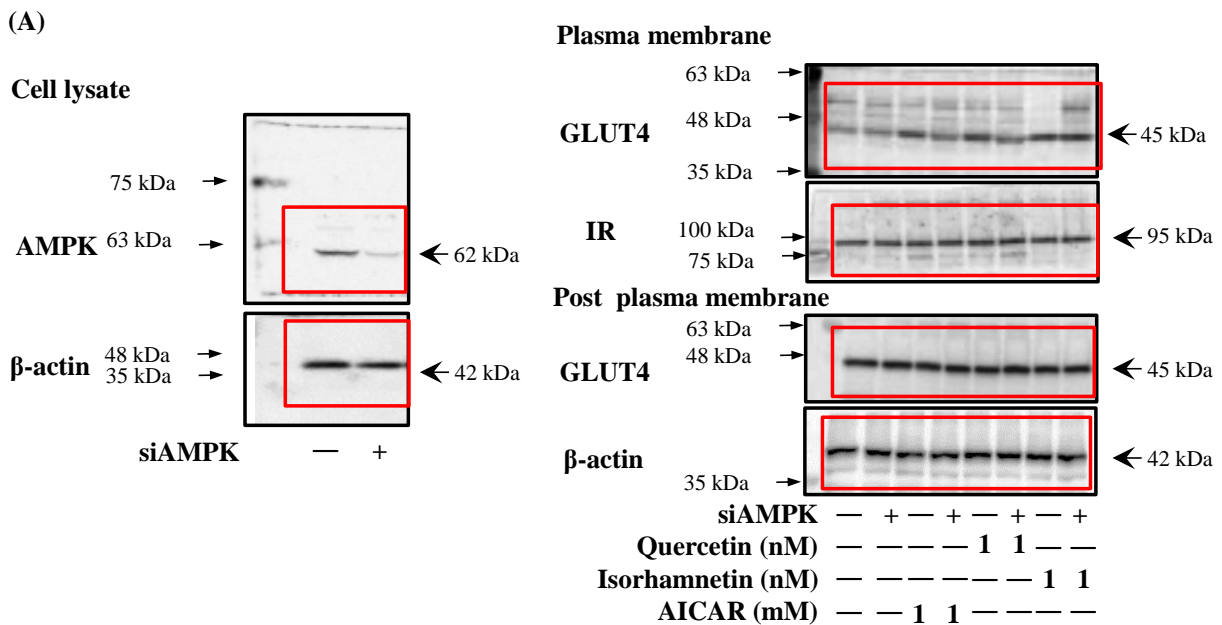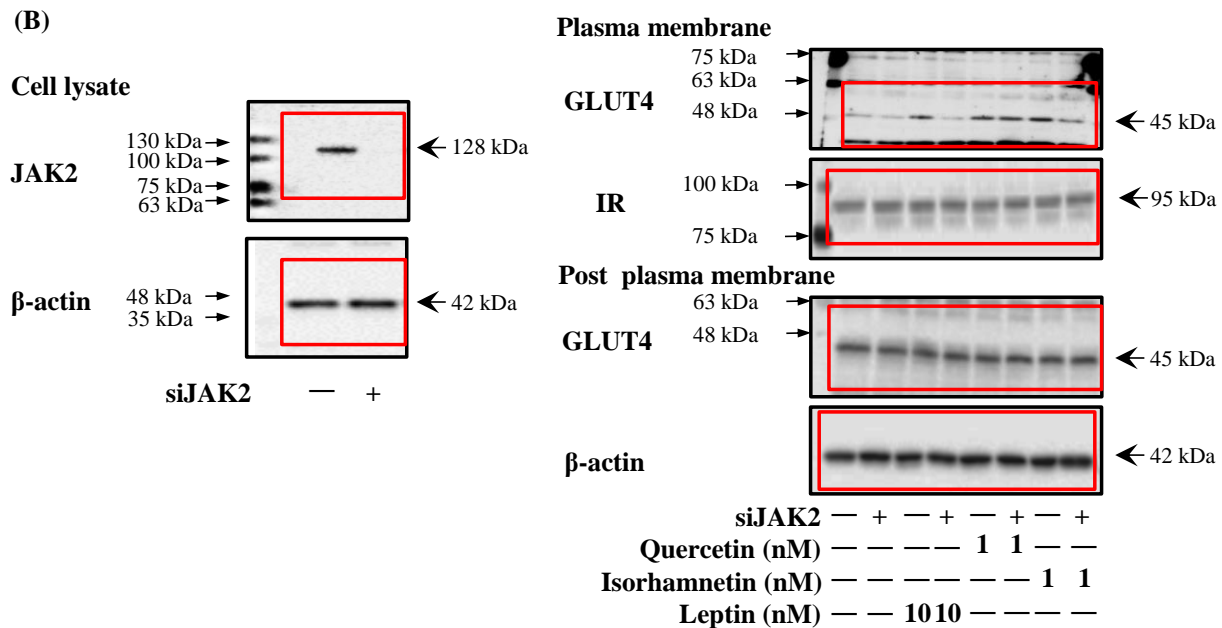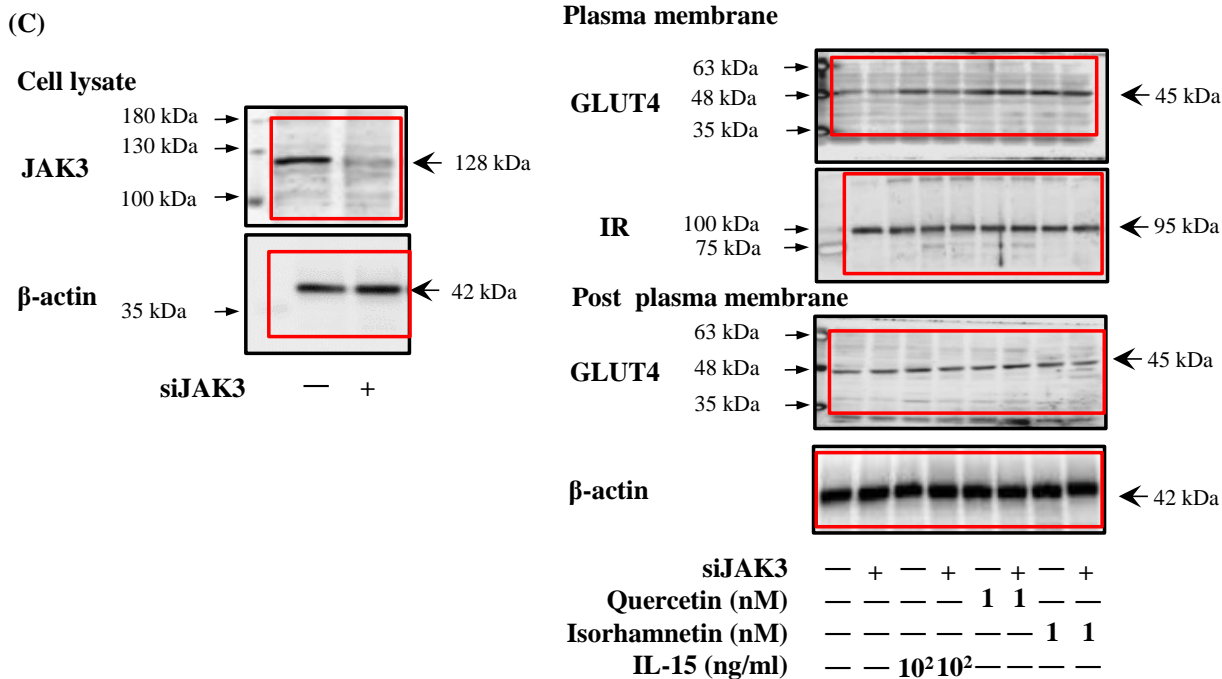



**Plasma membrane**

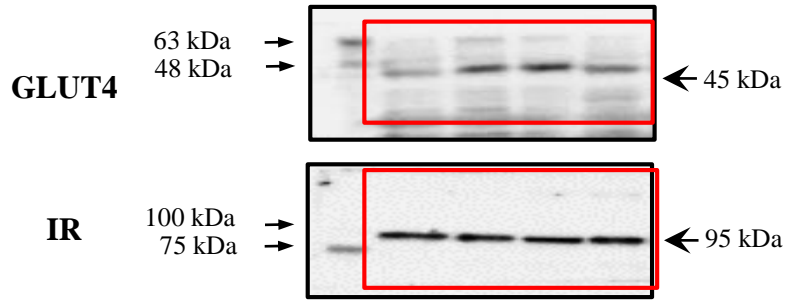

**Post plasma membrane**

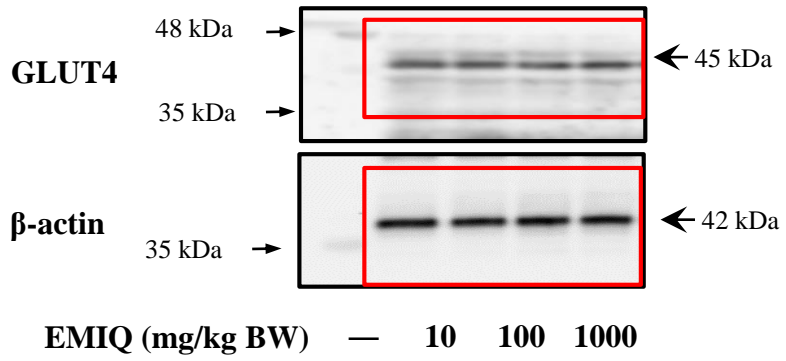

Supplemental Figure 10 (Support data for Supplemental Figure 1)

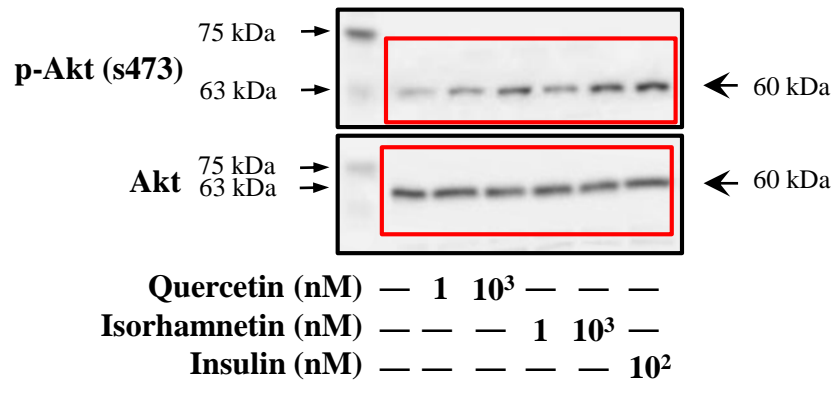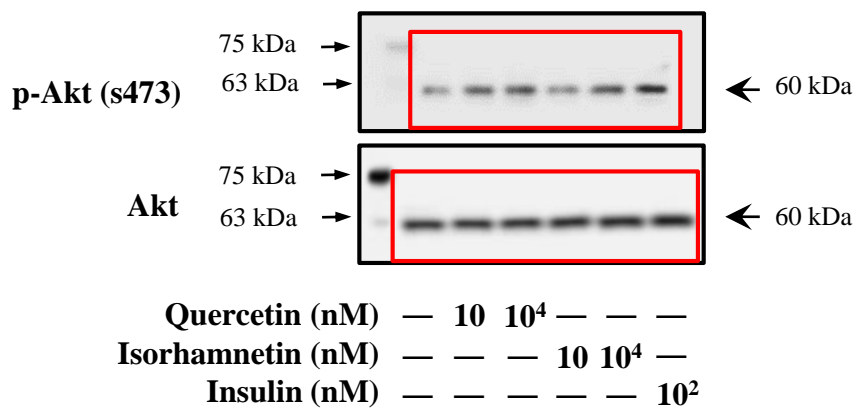

Supplemental Figure 11 (Support data for Supplemental Figure 2)

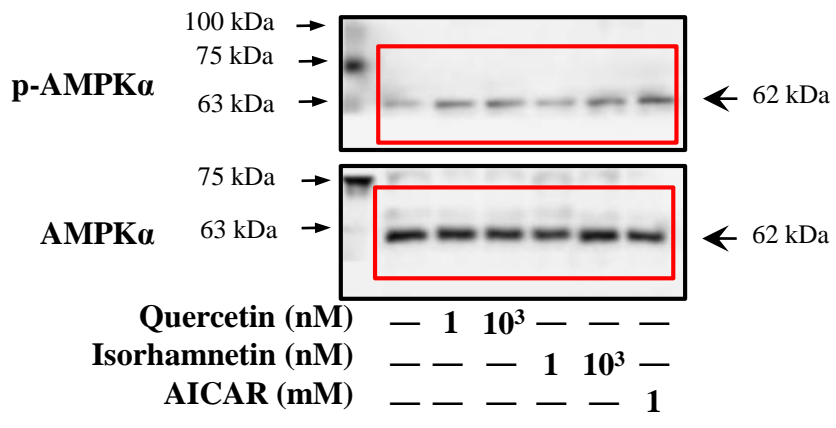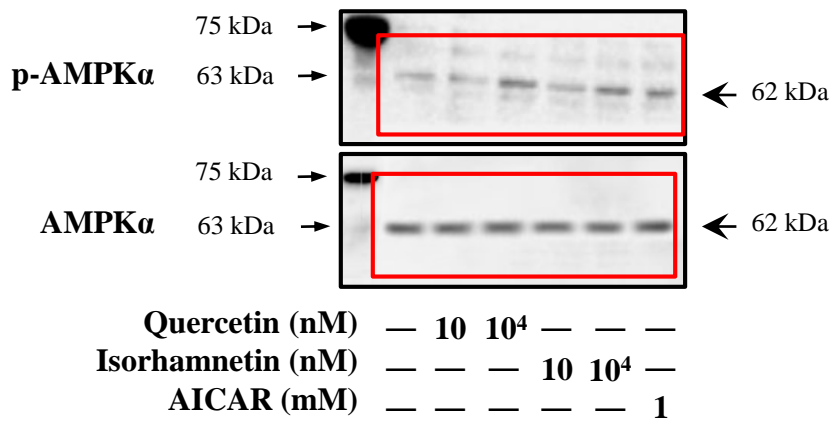

Supplemental Figure 12 (Support data for Supplemental Figure 3)

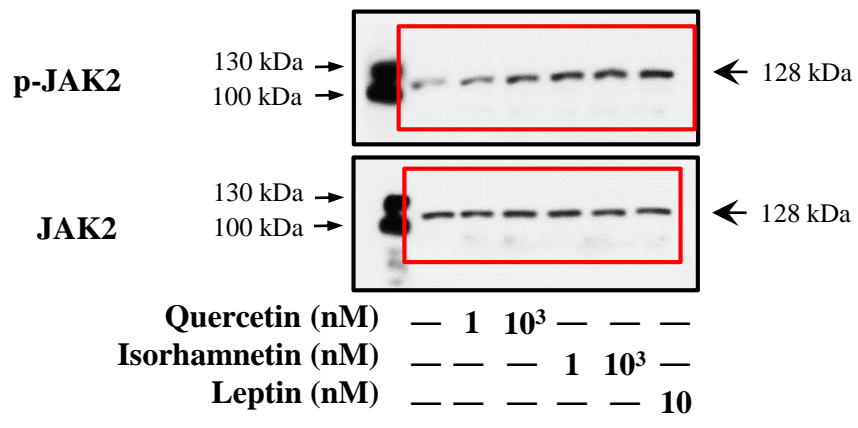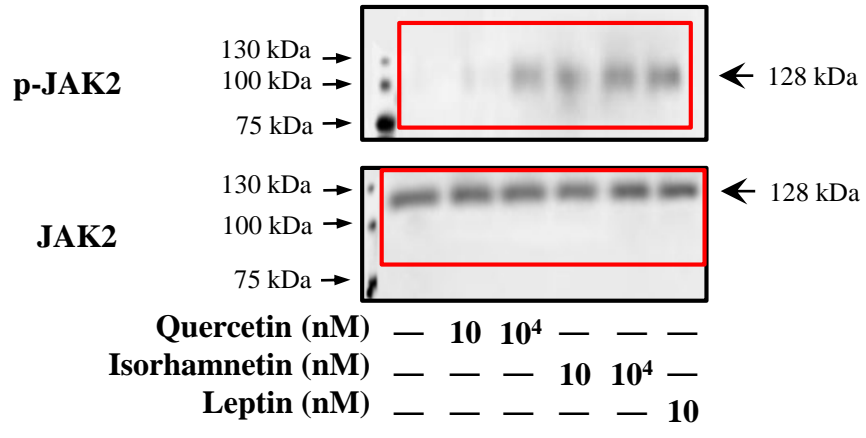

Supplement: 41598_2019_38711_MOESM1_ESM.pdf [file 41598_2019_38711_MOESM1_ESM.pdf]
